# Supplementary material for: Association of Upper Lip Morphology Characteristics with Sagittal and Vertical Skeletal Patterns: A Cross Sectional Study
Source: MDPI journal article supplement (doi:10.3390/diagnostics11091713), 2021-09-18
Supplement: s1 [file s1]

**Table S2.** Demographic and clinical characteristics of samples involved in this study stratified by sagittal and vertical skeletal pattern.

[illegible]

|                                                   |              |              |              |              |              |               |              |              |              |              |        |
|---------------------------------------------------|--------------|--------------|--------------|--------------|--------------|---------------|--------------|--------------|--------------|--------------|--------|
| Normal                                            | 1125(54.1)   | 61(72.6)     | 148(59.7)    | 429(67.5)    | 59(46.1)     | 43(39.4)      | 197(43.4)    | 6(22.2)      | 69(40.8)     | 113(50.4)    | <0.001 |
| Cross                                             | 234(11.3)    | 8(9.5)       | 4(1.6)       | 24(3.8)      | 1(0.8)       | 0(0.0)        | 4(0.9)       | 19(70.4)     | 85(50.3)     | 89(39.7)     |        |
| Deep                                              | 690(33.2)    | 14(16.7)     | 95(38.3)     | 175(27.5)    | 67(52.3)     | 66(60.6)      | 252(55.5)    | 0(0.0)       | 11(6.5)      | 10(4.5)      |        |
| Shallow                                           | 30(1.4)      | 1(1.2)       | 1(0.4)       | 8(1.3)       | 1(0.8)       | 0(0.0)        | 1(0.2)       | 2(7.4)       | 4(2.4)       | 12(5.4)      |        |
| <b>U1-ANS</b>                                     |              |              |              |              |              |               |              |              |              |              |        |
| <b>(mm) (mean (SD))</b>                           | 27.60(3.08)  | 29.61(2.68)  | 26.40(2.83)  | 27.70(2.82)  | 29.55(2.58)  | 26.82(2.89)   | 28.60(2.84)  | 28.49(2.95)  | 25.04(3.18)  | 26.97(2.92)  | <0.001 |
| <b>U1-OP</b>                                      |              |              |              |              |              |               |              |              |              |              |        |
| <b>(mean (SD))</b>                                | 54.09(7.65)  | 53.36(4.96)  | 56.27(8.16)  | 53.48(7.24)  | 52.88(7.77)  | 55.99(9.66)   | 54.34(8.00)  | 51.47(5.03)  | 55.03(8.25)  | 52.53(6.03)  | <0.001 |
| <b>U1-PP (mm)</b>                                 |              |              |              |              |              |               |              |              |              |              |        |
| <b>(mean (SD))</b>                                | 27.28(3.12)  | 29.40(2.64)  | 26.05(2.87)  | 27.38(2.86)  | 29.27(2.64)  | 26.43(2.93)   | 28.29(2.88)  | 28.29(2.95)  | 24.69(3.17)  | 26.60(2.93)  | <0.001 |
| <b>U1-NA</b>                                      |              |              |              |              |              |               |              |              |              |              |        |
| <b>(mean (SD))</b>                                | 27.92(8.76)  | 26.42(6.44)  | 27.94(9.24)  | 28.33(7.84)  | 23.91(8.90)  | 25.95(9.80)   | 24.95(8.94)  | 29.92(5.40)  | 33.64(8.17)  | 32.04(7.04)  | <0.001 |
| <b>U1-NA</b>                                      |              |              |              |              |              |               |              |              |              |              |        |
| <b>(mm) (mean (SD))</b>                           | 5.65(2.85)   | 5.68(2.82)   | 5.39(2.96)   | 5.85(2.66)   | 4.77(2.51)   | 4.80(2.58)    | 4.78(2.66)   | 6.75(2.20)   | 6.67(3.03)   | 7.12(2.93)   | <0.001 |
| <b>U1-SN</b>                                      |              |              |              |              |              |               |              |              |              |              |        |
| <b>(mean (SD))</b>                                | 108.46(9.48) | 102.93(6.58) | 110.64(9.47) | 108.25(8.76) | 102.49(9.07) | 110.26(11.13) | 106.48(9.77) | 106.56(6.44) | 114.44(9.10) | 110.96(7.44) | <0.001 |
| <b>U1-PP</b>                                      |              |              |              |              |              |               |              |              |              |              |        |
| <b>(mean (SD))</b>                                | 119.54(8.88) | 116.92(6.62) | 119.78(9.31) | 119.52(8.41) | 116.31(8.86) | 119.74(10.90) | 117.96(9.14) | 119.61(5.77) | 123.82(8.91) | 121.99(7.20) | <0.001 |
| <b>U1-NPo</b>                                     |              |              |              |              |              |               |              |              |              |              |        |
| <b>(mm) (mean (SD))</b>                           | 9.86(4.92)   | 10.75(3.88)  | 8.04(3.85)   | 9.78(3.48)   | 15.64(4.25)  | 11.30(3.81)   | 13.58(3.93)  | 4.33(2.69)   | 4.19(2.87)   | 5.21(3.37)   | <0.001 |
| <b>UL-EP (mm)</b>                                 |              |              |              |              |              |               |              |              |              |              |        |
| <b>(mean (SD))</b>                                | 0.53(2.85)   | 0.85(2.56)   | 0.17(2.42)   | 0.50(2.24)   | 2.67(2.46)   | 1.66(2.08)    | 2.42(2.31)   | -2.82(1.96)  | -2.51(2.35)  | -2.03(2.44)  | <0.001 |
| <b>Upper lip to S line (mean (SD))</b>            | 4.60(2.64)   | 4.20(2.91)   | 4.84(2.74)   | 4.64(2.45)   | 3.83(2.67)   | 4.77(2.40)    | 4.23(2.49)   | 3.47(3.54)   | 5.52(2.88)   | 4.93(2.76)   | <0.001 |
| <b>Upper Lip Length (ULL) (mm) (mean (SD))</b>    | 21.46(2.40)  | 22.55(1.97)  | 20.91(2.15)  | 21.45(2.25)  | 22.57(2.39)  | 21.90(2.35)   | 22.11(2.25)  | 21.39(1.98)  | 19.86(2.78)  | 20.71(2.29)  | <0.001 |
| <b>Basic upper lip thickness (mm) (mean (SD))</b> | 14.48(1.97)  | 14.76(1.72)  | 14.44(1.84)  | 14.37(1.82)  | 13.84(1.85)  | 14.37(2.09)   | 14.17(2.01)  | 15.26(2.04)  | 15.43(2.07)  | 14.98(2.06)  | <0.001 |
| <b>Nasolabial A (mean</b>                         | 95.74(11.83) | 95.62(10.56) | 94.46(12.10) | 96.34(11.10) | 99.26(11.28) | 97.95(9.99)   | 99.43(11.19) | 95.67(14.26) | 87.81(12.18) | 90.90(11.28) | <0.001 |

|                                                          |             |             |             |             |             |             |             |             |             |             |        |
|----------------------------------------------------------|-------------|-------------|-------------|-------------|-------------|-------------|-------------|-------------|-------------|-------------|--------|
| (SD))<br>Upper lip<br>thickness<br>(mm) (mean<br>(SD))   | 14.85(2.50) | 15.60(2.49) | 14.67(2.54) | 14.75(2.36) | 14.08(2.21) | 14.22(2.19) | 14.54(2.44) | 15.73(2.73) | 15.96(2.81) | 15.48(2.55) | <0.001 |
| (SD))<br>Superior<br>sulcus depth<br>(mm) (mean<br>(SD)) | 4.84(2.17)  | 4.64(2.12)  | 5.09(2.24)  | 4.79(2.14)  | 4.11(2.21)  | 4.86(2.20)  | 4.44(2.09)  | 4.48(2.05)  | 5.84(2.15)  | 5.27(2.03)  | <0.001 |
