# Supplementary material for: Association of Upper Lip Morphology Characteristics with Sagittal and Vertical Skeletal Patterns: A Cross Sectional Study
Source: MDPI journal article supplement (doi:10.3390/diagnostics11091713), 2021-09-18
Supplement: s1 [file s1]

**Table S3.** Adjusted values of upper lip characteristics in sagittal and vertical skeletal patterns.

| <b>Level</b>                                      | <b>Overall</b> | <b>Class I</b>        | <b>Class II</b>       | <b>Class III</b>     | <b>P-value</b> |
|---------------------------------------------------|----------------|-----------------------|-----------------------|----------------------|----------------|
| <b>N</b>                                          | 2079           | 968                   | 691                   | 420                  |                |
| <b>Nasolabial A (mean (SD))</b>                   | 95.74 (8.74)   | 95.80 (7.93)          | 99.17 (7.91)          | 89.96 (8.80)         | <0.001         |
| <b>Upper Lip Length (ULL) (mm) (mean (SD))</b>    | 21.46 (1.93)   | 21.41 (1.77)          | 22.16 (1.85)          | 20.41 (1.90)         | <0.001         |
| <b>Basic upper lip thickness (mm) (mean (SD))</b> | 14.48 (1.59)   | 14.40 (1.58)          | 14.33 (1.50)          | 14.74 (1.63)         | <0.001         |
| <b>Upper lip thickness (mm) (mean (SD))</b>       | 14.85 (2.07)   | 14.80 (2.04)          | 14.40 (1.87)          | 15.69 (2.20)         | <0.001         |
| <b>Superior sulcus depth (mm) (mean (SD))</b>     | 4.84 (2.02)    | 4.85 (2.01)           | 4.44 (1.92)           | 5.45 (2.05)          | <0.001         |
| <b>Level</b>                                      | <b>Overall</b> | <b>Normodivergent</b> | <b>Hyperdivergent</b> | <b>Hypodivergent</b> | <b>P-value</b> |
| <b>N</b>                                          | 2079           | 1314                  | 239                   | 526                  |                |
| <b>Nasolabial A (mean (SD))</b>                   | 95.74 (8.74)   | 96.48 (8.37)          | 97.57 (8.45)          | 93.05 (9.19)         | <0.001         |
| <b>Upper Lip Length (ULL) (mm) (mean (SD))</b>    | 21.46 (1.93)   | 21.55 (1.83)          | 22.43 (1.88)          | 20.78 (1.95)         | <0.001         |
| <b>Basic upper lip thickness (mm) (mean (SD))</b> | 14.48 (1.59)   | 14.42 (1.48)          | 14.14 (1.62)          | 15.18 (1.57)         | <0.001         |
| <b>Upper lip thickness (mm) (mean (SD))</b>       | 14.85 (2.07)   | 14.80 (2.00)          | 14.80 (2.01)          | 14.99 (2.27)         | 0.198          |
| <b>Superior sulcus depth (mm) (mean (SD))</b>     | 4.84 (2.02)    | 4.75 (1.96)           | 4.34 (2.03)           | 5.28 (2.10)          | <0.001         |
