# Supplementary material for: Association of Upper Lip Morphology Characteristics with Sagittal and Vertical Skeletal Patterns: A Cross Sectional Study
Source: MDPI journal article supplement (doi:10.3390/diagnostics11091713), 2021-09-18
Supplement: s1 [file s1]

**Table S4.** Adjusted values of upper lip characteristics stratified by sagittal and vertical skeletal patterns.

| Level                                      | Overall      | I-Hyper      | I-Hypo       | I-Norm       | II-Hyper     | II-Hypo      | II-Norm      | III-Hyper    | III-Hypo     | III-Norm     | P      |
|--------------------------------------------|--------------|--------------|--------------|--------------|--------------|--------------|--------------|--------------|--------------|--------------|--------|
| N                                          | 2079         | 84           | 248          | 636          | 128          | 109          | 454          | 27           | 169          | 224          |        |
| Nasolabial A (mean (SD))                   | 95.74 (8.75) | 95.62 (8.19) | 94.46 (8.04) | 96.34 (7.84) | 99.26 (8.15) | 97.95 (7.92) | 99.43 (7.78) | 95.67 (8.81) | 87.81 (9.14) | 90.90 (8.17) | <0.001 |
| Upper Lip Length (ULL) (mm) (mean (SD))    | 21.46 (1.93) | 22.55 (1.70) | 20.91 (1.76) | 21.45 (1.73) | 22.57 (1.89) | 21.90 (1.83) | 22.11 (1.81) | 21.39 (2.00) | 19.86 (1.97) | 20.71 (1.73) | <0.001 |
| Basic upper lip thickness (mm) (mean (SD)) | 14.48 (1.59) | 14.76 (1.33) | 14.44 (1.49) | 14.37 (1.49) | 13.84 (1.47) | 14.37 (1.71) | 14.17 (1.63) | 15.26 (1.32) | 15.43 (1.63) | 14.98 (1.55) | <0.001 |
| Upper lip thickness (mm) (mean (SD))       | 14.85 (2.07) | 15.60 (2.01) | 14.67 (2.24) | 14.75 (1.94) | 14.08 (1.66) | 14.22 (1.83) | 14.54 (1.92) | 15.73 (2.39) | 15.96 (2.26) | 15.48 (2.11) | <0.001 |
| Superior sulcus depth (mm) (mean (SD))     | 4.84 (2.02)  | 4.64 (2.08)  | 5.09 (2.12)  | 4.79 (1.96)  | 4.11 (1.99)  | 4.86 (1.85)  | 4.44 (1.90)  | 4.48 (2.06)  | 5.84 (2.14)  | 5.27 (1.94)  | <0.001 |
